# Supplementary material
Source: PubMed Central journal article supplement (PMC6136423)
Supplement: NIHMS953477-supplement-Supplemental.pdf [file NIHMS953477-supplement-Supplemental.pdf]

**Supplemental Figure Legends**

**A**

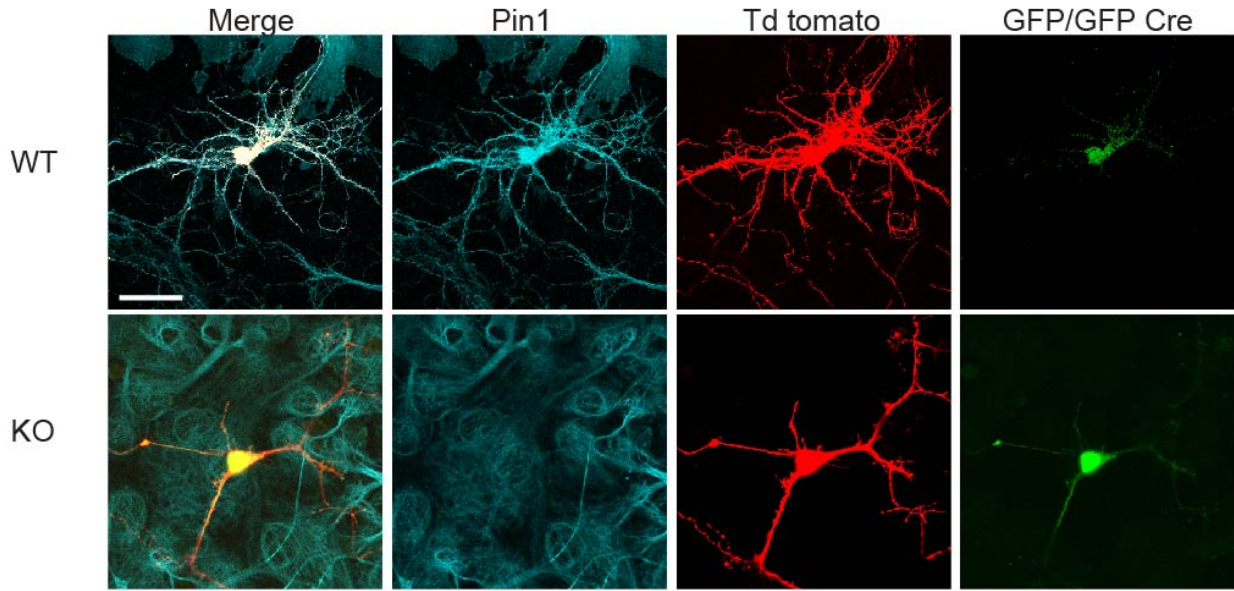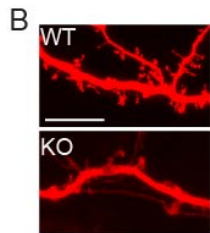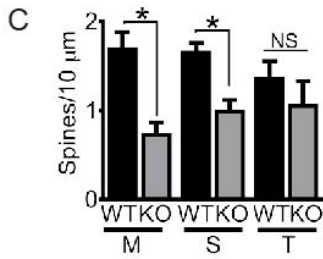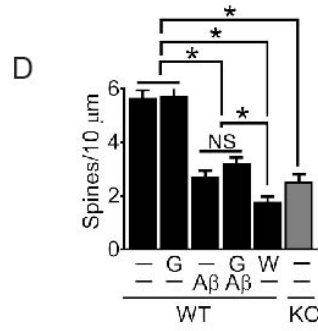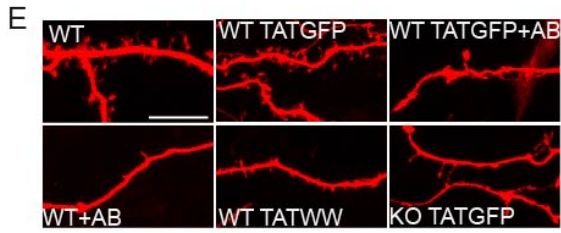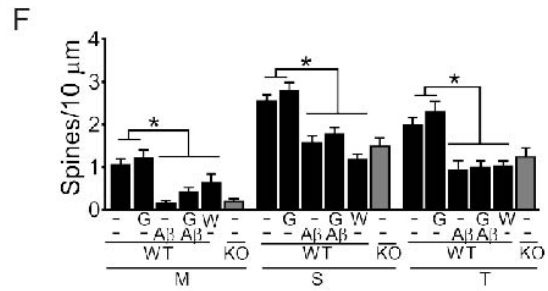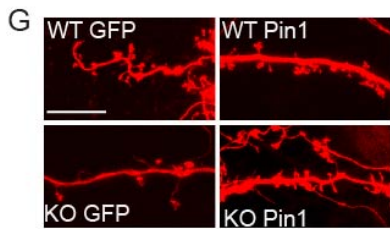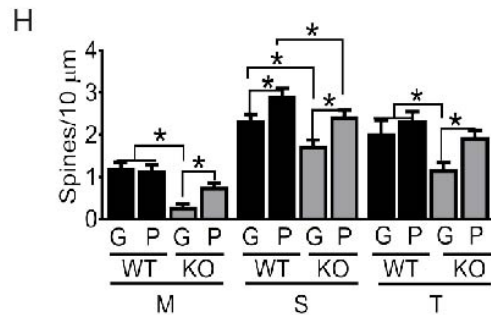

**S1: Pin1 loss of A $\beta$ 42 causes spine loss.**

(A) Representative immunofluorescence images of DIV21 Pin1<sup>fl/fl</sup> neurons after transfection on DIV7 with Td-tomato and NLS-GFP (WT) or NLS-GFP-Cre (KO). Cells were stained and visualized as shown. Scale bar = 50  $\mu$ m. (B) Representative dendritic shaft analyzed for spines in **Fig. 1A**. (C) The total spine counts from **Fig. 1A** subtyped as mushroom (M), stubby (S) and thin (T) for DIV21 WT (black) and DIV21 KO (grey) neurons. (D) Total spine counts in WT (black) or KO (grey) untransduced neurons or transduced with TAT-GFP (G) or TAT-WW (W)  $\pm$  A $\beta$ 42 (A $\beta$ ). (E) Representative dendritic shaft analyzed for spines in **fig. S1C**. (F) Total spine counts from **fig. S1D** sub-typed as M, S and T spines of WT (black) and KO (grey) neurons transduced with TAT-WW (W) or TAT-GFP (G). (G) Representative dendritic shaft analyzed for spines in **Fig. 1B**. (H) Total spine counts from **Fig. 1B** subtyped as M, S and T for WT (black) and KO (grey) neurons transduced with TAT-Pin1 (P) or TAT-GFP (G). Scale bar = 10  $\mu$ m (**S1A, S1C, S1F**). The data are mean  $\pm$  SEM. N >100 spines from  $\geq 15$  images and  $\geq 3$  coverslips per condition were counted. \* =  $P < 0.05$  by Fisher's LSD Test following two-way analysis of variance (ANOVA) (**S1B, S1C, S1E, S1G**).

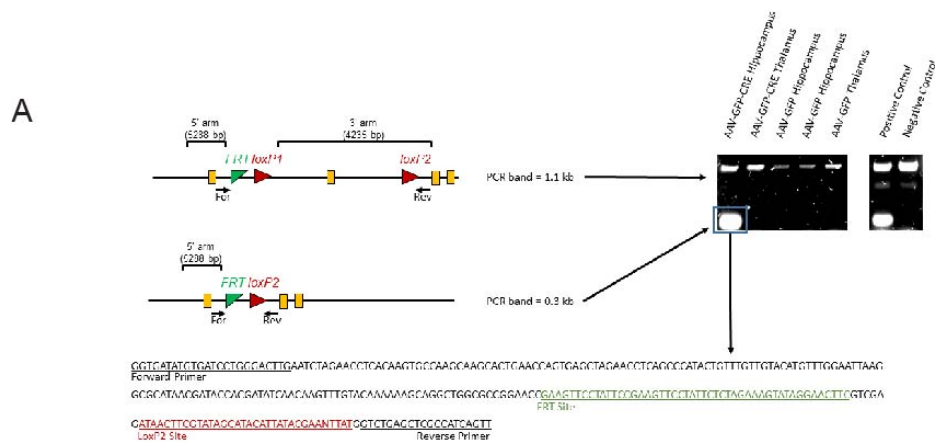

**B**

| NP Number | Age | Sex | Region   | Clinical Diagnosis | Braak Stage | PMI (hr) |
|-----------|-----|-----|----------|--------------------|-------------|----------|
| 16479     | 60  | M   | Parietal | Control            | n/a         | 5.0      |
| 24385     | 73  | M   | Parietal | Control            | n/a         | 4.75     |
| 24509     | 67  | M   | Frontal  | Control            | n/a         | 9.5      |
| 35289     | 71  | F   | Frontal  | AD                 | VI          | 12.7     |
| 44810     | 56  | F   | Parietal | AD                 | VI          | 6.2      |
| 45408     | 73  | M   | Parietal | AD                 | VI          | 15.5     |
| 46879     | 76  | F   | Parietal | AD                 | VI          | 36.2     |
| 47833     | 82  | M   | Parietal | AD                 | VI          | 40.8     |

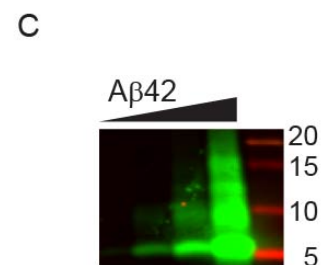

## S2: Pin1 successfully recombined in mouse hippocampus after AAV-GFP-CRE

(A) Pre- and post-recombination of the conditional locus of Pin1<sup>fl/fl</sup> mice with PCR products. After laser capture of GFP+ or - cells from the hippocampus of AAV-GFP or AAV-GFP-Cre injected mice, DNA was analyzed for recombination by PCR. (B) Demographics of AD or control samples used in **Fig. 2A** and **2B**. (C) Multimeric Aβ42 analyzed by western blot.

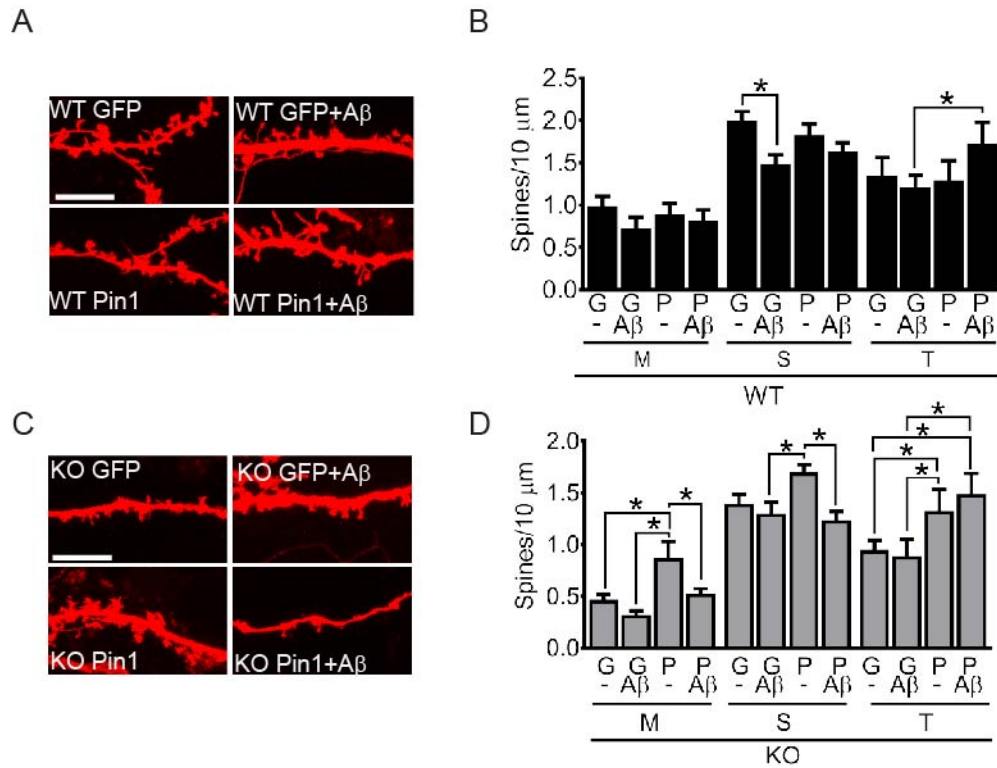

E

| Gene          | CN Subunit | kD   | Peptides | % Coverage |
|---------------|------------|------|----------|------------|
| <i>Pin1</i>   | --         | 18.4 | 163      | 92         |
| <i>Ppp3ca</i> | catalytic  | 58.8 | 41       | 55         |
| <i>Ppp3cb</i> | catalytic  | 59.0 | 26       | 47         |
| <i>Ppp3r1</i> | regulatory | 18.2 | 17       | 78         |

### S3: Pin1 reconstitution restores mature spine counts after A $\beta$ 42.

(A) Representative dendritic shaft analyzed in **Fig. 3A**. Scale bar = 10  $\mu$ m. (B) Total spine counts from **Fig. 3A** subtyped as M, S and T for DIV21 WT (black) neurons transduced with TAT-GFP (G) or TAT-Pin1 (P)  $\pm$  A $\beta$ 42 (A $\beta$ ). (C) Representative dendritic shaft analyzed in **Fig. 3B**. Scale bar = 10  $\mu$ m. (D) Total spine counts from **Fig. 3B** subtyped as M, S and T for DIV21 KO (grey) neurons transduced with TAT-GFP (G) or TAT-Pin1 (P)  $\pm$  A $\beta$ 42 (A $\beta$ ). (E) SN proteins, number of independent peptides and percent coverage identified by mass spectrometry associated with Pin1. The data are mean  $\pm$  SEM. N >100 spines from  $\geq 15$  images and  $\geq 3$  coverslips per condition were counted. \* =  $P < 0.05$  by Fisher's LSD Test following two-way analysis of variance (ANOVA) (**S2B**, **S2D**).

A

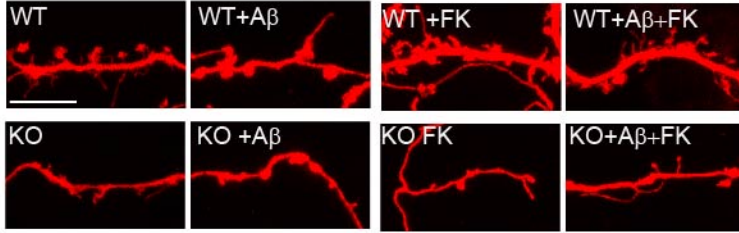

B

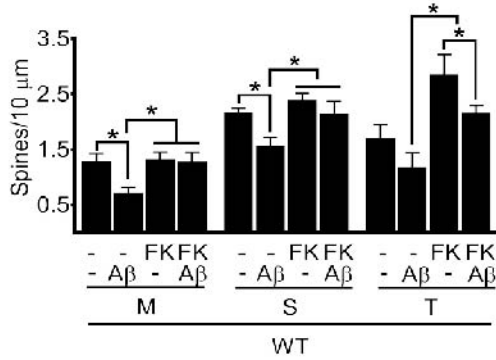

C

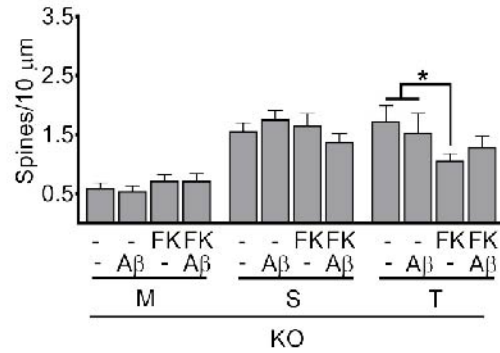

**S4: FK506 restoration of spines requires Pin1.**

(A) Representative dendritic shaft analyzed in **Fig. 4A**. Scale bar = 10  $\mu$ m. (B) Total spine counts from **Fig. 4A** subtyped as M, S and T for DIV21 WT (black) or (C) DIV21 KO (grey) neurons  $\pm$  FK506 (FK)  $\pm$  A $\beta$ 42 (A $\beta$ ). The data are mean  $\pm$  SEM. N > 100 spines from  $\geq$  15 images and  $\geq$  3 coverslips per condition were counted. \* =  $P < 0.05$  by Fisher's LSD Test following two-way analysis of variance (ANOVA) (**S3B**, **S3C**).

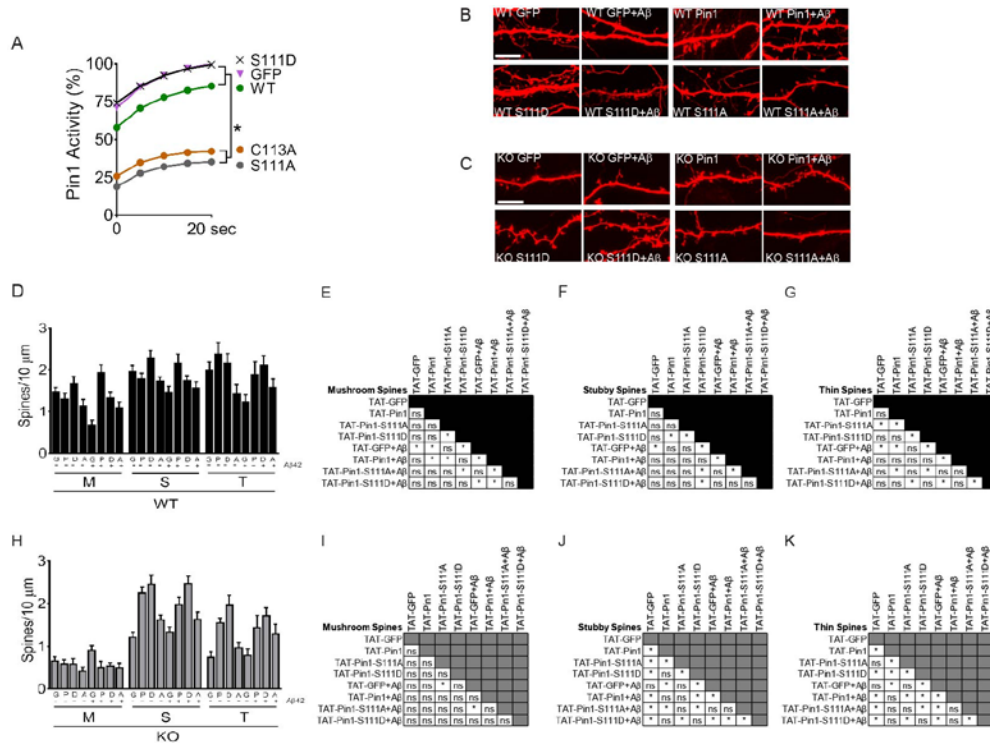

**S5: Pin1-S111D restores spine counts in WT or KO cells treated with Aβ42.**

(A) SN were transduced with 100 nM TAT-GFP, TAT-Pin1-S111D, TAT-Pin1 (WT), TAT-Pin1-S111A or TAT-Pin1-C113A prior to lysis and isomerase activity determination. The means are  $N \geq 8$  replicates per treatment, \* =  $P < 0.05$  by Fisher's LSD Test following two-way analysis of variance (ANOVA). (B) Representative dendritic shaft analyzed in Fig. 4C. Scale bar = 10  $\mu$ m. (C) Representative dendritic shaft analyzed in Fig. 4D. Scale bar = 10  $\mu$ m. (D) Total spine counts from Fig. 4C subtyped into M, S and T spine densities of WT (black) neurons that were treated with TAT-GFP (G), TAT-Pin1 (P), TAT-Pin1-S111A (A) or TAT-Pin1-S111D (D) for 3 hr prior to vehicle (-) or 100 nM A $\beta$ 42 (A $\beta$ ) for 1 additional hour. (E-G) Statistical significance of (E) mushroom, (F) stubby and (G) thin WT (black) spines presented in S4D. (H) Same as in (D) except KO (grey) neurons from Fig. 4D. (I-K) Statistical significance of (I) mushroom, (J) stubby and (K) thin KO (grey) spines presented in S4H. The data are mean  $\pm$  SEM.  $N > 100$  spines from  $\geq 15$  images and  $\geq 3$  coverslips per condition were counted (S5D, S5H). \* =  $P < 0.05$  by Fisher's LSD Test following two-way analysis of variance (ANOVA) (S5E thru G and S5I thru K).
